# Supplementary material for: miR-101 targeting ZFX suppresses tumor proliferation and metastasis by regulating the MAPK/Erk and Smad pathways in gallbladder carcinoma
Source: PubMed Central journal article supplement (PMC5008364; doi:10.18632/oncotarget.7970), 2016-03-08
Supplement: oncotarget-07-22339-s001.pdf [file oncotarget-07-22339-s001.pdf]

## SUPPLEMENTARY FIGURES AND TABLE

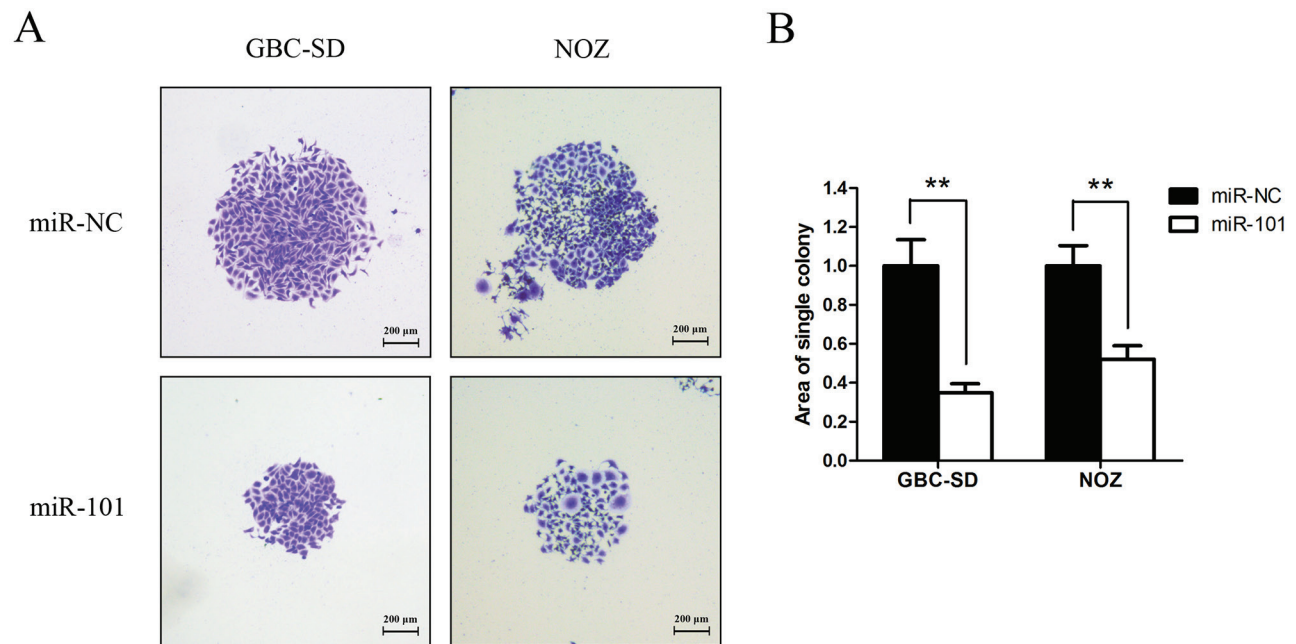

**Supplementary Figure S1: miR-101 suppresses GBC cell colony formation.** GBC-SD and NOZ cells transfected with miR-NC or miR-101 were allowed to form colonies in fresh medium. The photomicrographic differences **A.** and the mean area **B.** of the colonies are shown (\*\* $P < 0.01$ ).

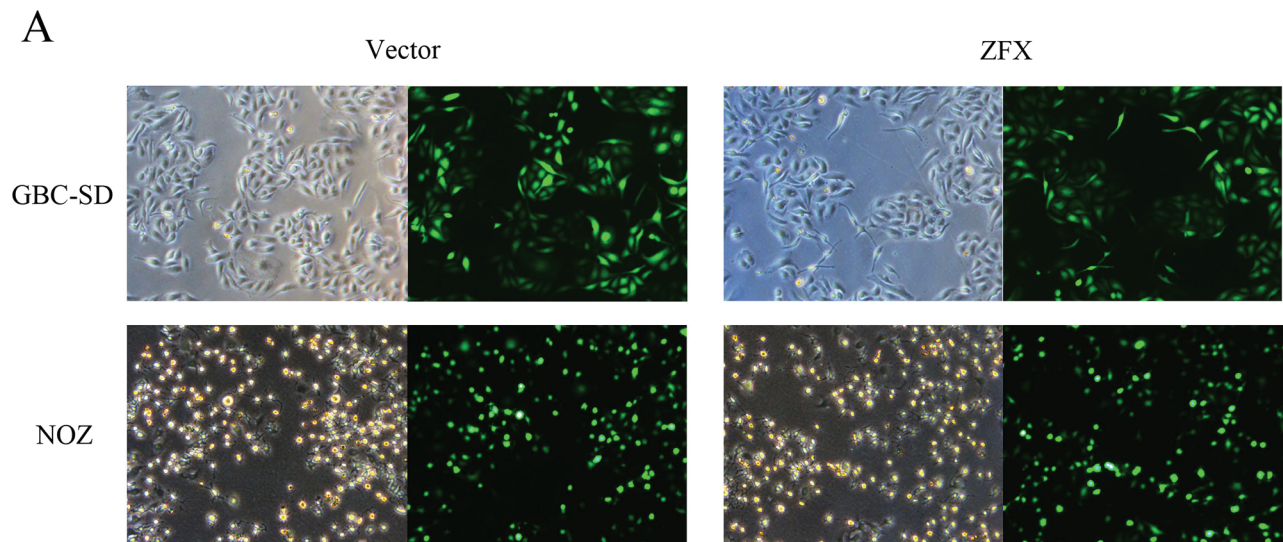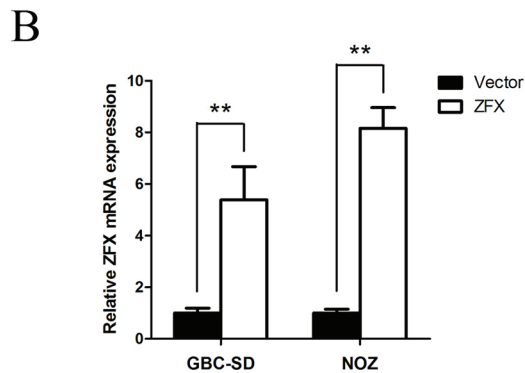

**Supplementary Figure S2: Transfection efficiencies of the ZFX plasmid and an empty vector.** GBC-SD and NOZ cells were transfected with either a ZFX overexpression plasmid or an empty vector plasmid, and the transfection efficiencies were detected by fluorescence microscopy **A.** and qRT-PCR **B.** (\*\* $P < 0.01$ ).

**Supplementary Table S1: The nucleotides applied in the study**

| Description | Name      | Sequence                       |
|-------------|-----------|--------------------------------|
| Primers for | miR-101-F | 5'-CGGTACAGTACTGTGATAACTGAA-3' |
| qRT-PCR     | U6-F      | 5'-CTCGCTTCGGCAGCACA-3'        |
|             | U6-R      | 5'-AACGCTTCACGAATTTGCGT-3'     |
|             | ZFX-F     | 5'-TGTGGAGTGTGGTAAGGGTTTT-3'   |
|             | ZFX-R     | 5'-ACTGGTGTGTTTTGCTTTCTTG-3'   |
|             | GAPDH-F   | 5'-AAGCTCATTTCTGGTATGACA-3'    |
|             | GAPDH-R   | 5'-TCTTACTCCTTGGAGGCCATGT-3'   |
| miR mimics  | miR-101   | 5'-UACAGUACUGUGAUAAACUGAA-3'   |
|             | miR-NC    | 5'-UCACAACCUCCUAGAAAGAGUAGA-3' |
